# Supplementary material
Source: PubMed Central journal article supplement (PMC6641358)
Supplement: ao7b01825_si_001.pdf [file ao7b01825_si_001.pdf]

# Plasma Synthesis of Graphene from Mango Peel

*Javishk Shah<sup>1</sup>, Janneth Lopez-Mercado<sup>2</sup>, M. Guadalupe Carreon<sup>3</sup>, Armando Lopez-Miranda<sup>4</sup>, and Maria L. Carreon<sup>1\*</sup>.*

<sup>1\*</sup>University of Tulsa, Chemical Engineering Department, 800 South Tucker Drive, 74104-9700  
Tulsa, Oklahoma, US.

<sup>2</sup> Instituto Tecnológico de Estudios Superiores de Zamora, Departamento de Ingeniería de Industrias Alimentarias, Km 7 Carretera Zamora-La Piedad S/N. Colonia el Sauz de abajo, 59720, Zamora, Michoacán, Mexico.

<sup>3</sup> UMSNH, Ciudad Universitaria, Instituto de Investigaciones Químico-Biológicas, Gral. Francisco J. Mugica SN, Felicitas del Rio, 58040, Morelia, Michoacan, Mexico.

<sup>4</sup>Centro Nacional de Metrología, Dirección de Materiales de Referencia, Carretera a los Cues km. 4.5, 76246, El Marques, Queretaro, Mexico.

## Thermogravimetric Analysis (TGA) of Commercial Cellulose

The Thermogravimetric Analysis (TGA) was performed on a Perkin Elmer Pyris 1 Thermo Gravimetric Analyzer with the temperature ramp of  $25\text{ }^{\circ}\text{C min}^{-1}$  from  $50\text{ }^{\circ}\text{C}$  to  $750\text{ }^{\circ}\text{C}$  (reaction temperature) and a hold time for 12 minutes at  $750\text{ }^{\circ}\text{C}$ . The analysis was performed in a Helium flow of  $60\text{ ml min}^{-1}$ . These conditions are the same employed for the commercial pectin and the mango peels. We employed commercial cellulose from Alfa Aesar (Cellulose, microcrystalline). In **Figure S1** it is possible to observe the decomposition of cellulose at around  $364\text{ }^{\circ}\text{C}$ .

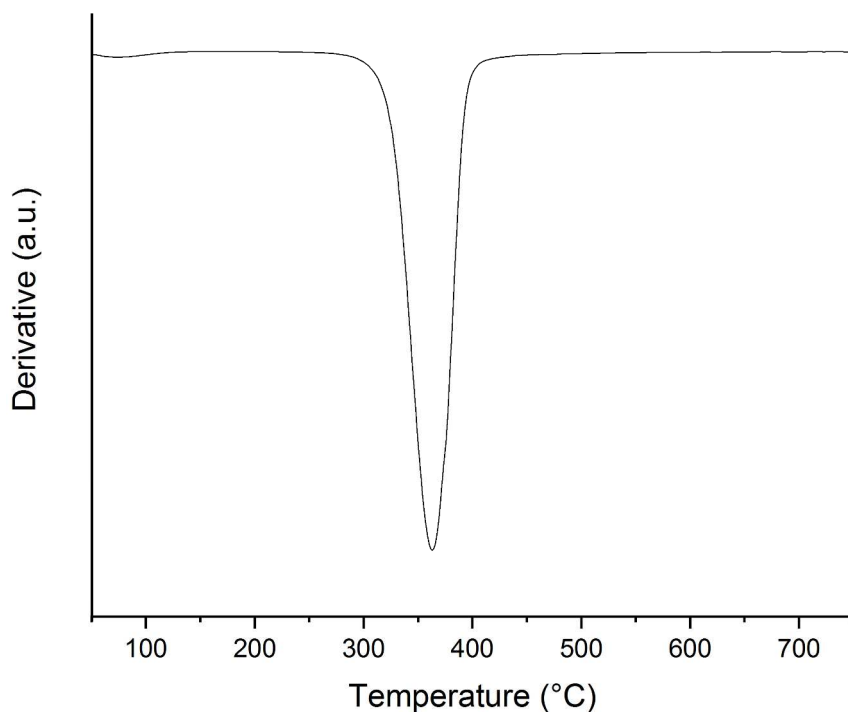

**Figure S1.** Thermogravimetric Analysis (TGA) of commercial cellulose.

## Pectin extraction from Mango Peels

The Mango peels (*mangifera induca L.*) type kent is considered rich in pectin. We extracted the pectin from the mango peel by acid hydrolysis extraction, a common method for this purpose<sup>1</sup>. We employed 3g: 10ml [Mango Peel: to acid solution ratio (H<sub>2</sub>SO<sub>4</sub>)] with a PH = 2, 80°C and 45min, with continuous stirring. We obtained ≈ 18% of pectin, dry base. The obtained pectin was analyzed by ATR-FTIR and we compared with the commercial pectin (citrus, VWR) (**Figure S2**). We observed characteristic peaks and just small variations in the absorption bands. The peak at 3331 cm<sup>-1</sup> is attributed to the O-H stretching, due to the inter- and intramolecular hydrogen bonds in the galacturonic acid. The 2921 cm<sup>-1</sup> band corresponds to the C-H stretching, including the C-H, C-H<sub>2</sub>, CH<sub>3</sub> variations<sup>2-3</sup>, and as it can be observed is intensity is higher for the pectin extracted from Mango peels. The 1732 cm<sup>-1</sup> and 1626cm<sup>-1</sup> bands are associated to carboxylic groups<sup>4</sup>. There are some differences in the bands attributed to the degree of esterification of each respectively<sup>4</sup>. The “fingerprint” region of pectin can be found in the region below 1500 cm<sup>-1</sup> <sup>2, 4</sup> where the variations are due to the differences in -CH<sub>3</sub>CO (1228 cm<sup>-1</sup>) variations, stretching of C-O (1015 cm<sup>-1</sup>) and the shoulder localized at 1143 cm<sup>-1</sup> associated to the pyranose rings<sup>3</sup>.

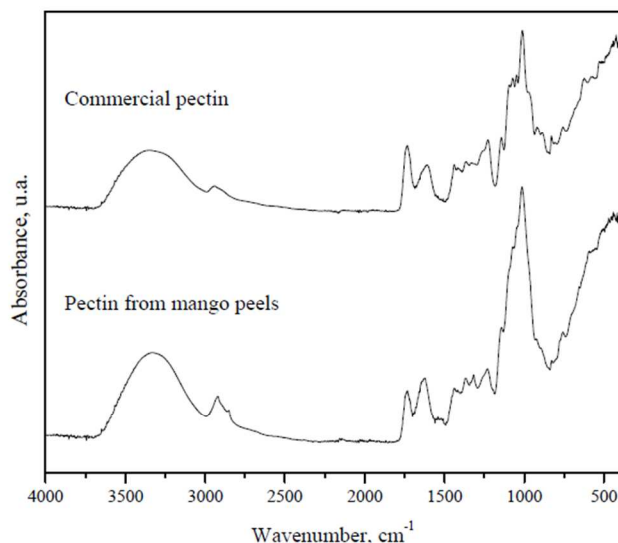

**Figure S2.** ATR-FTIR spectrum of pectin: commercial and Mango peels

**Representative SEM image of a sample synthesized at 120 minutes**

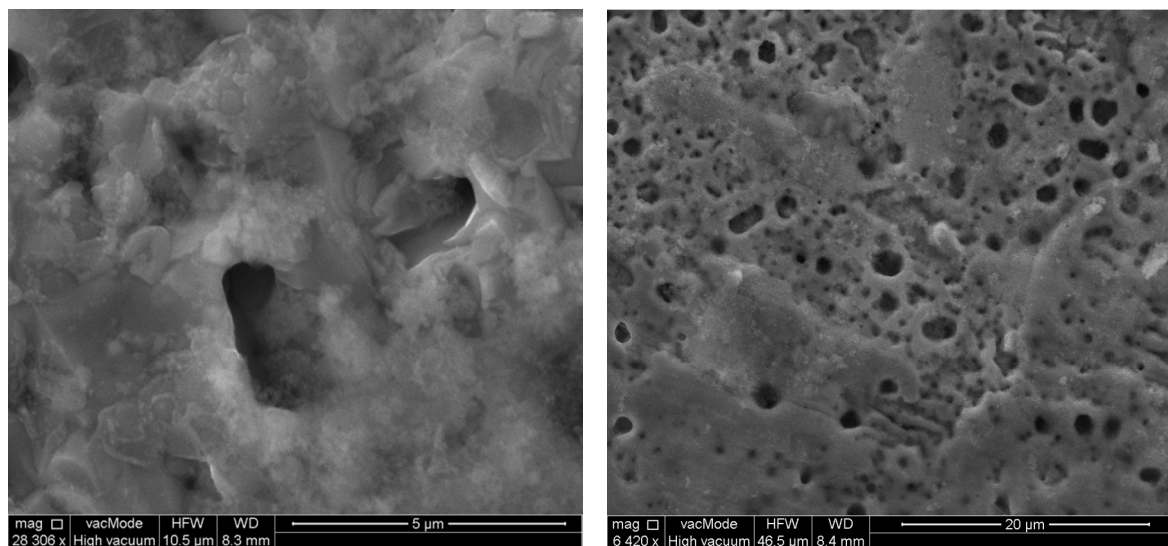

**Figure S3.** SEM images of sample exposed to plasma for 120 minutes

## References

1. Srivastava, P.; Malviya, R., Extraction, characterization and evaluation of orange peel waste derived pectin as a pharmaceutical excipient. *The Natural Products Journal* **2011**, *1* (1), 65-70.
2. Karnik, D.; Jung, J.; Hawking, S.; Wicker, L., Sugar beet pectin fractionated using isopropanol differs in galacturonic acid, protein, ferulic acid and surface hydrophobicity. *Food Hydrocolloids* **2016**, *60*, 179-185.
3. Alba, K.; Laws, A. P.; Kontogiorgos, V., Isolation and characterization of acetylated LM-pectins extracted from okra pods. *Food Hydrocolloids* **2015**, *43*, 726-735.
4. Urias-Orona, V.; Rascón-Chu, A.; Lizardi-Mendoza, J.; Carvajal-Millán, E.; Gardea, A. A.; Ramírez-Wong, B., A novel pectin material: extraction, characterization and gelling properties. *International journal of molecular sciences* **2010**, *11* (10), 3686-3695.
